# Supplementary material
Source: PubMed Central journal article supplement (PMC2448833)
Supplement: 0801273105_Supplemental_PDF.pdf [file 0801273105_Supplemental_PDF.pdf]

# Supporting Information

Rubio et al. 10.1073/pnas.0801273105

**A**

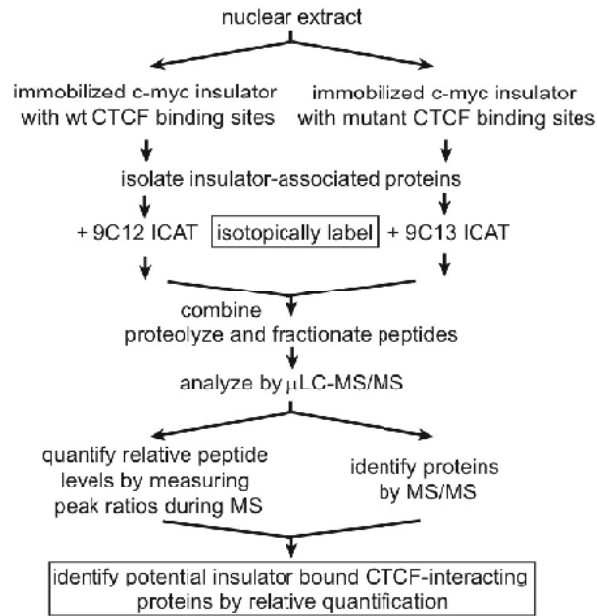

**B**

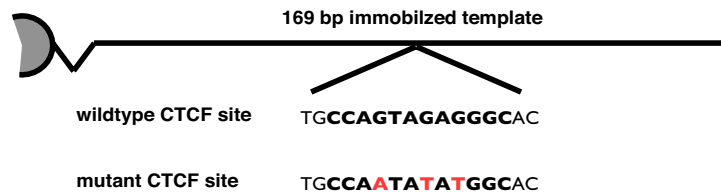

**C**

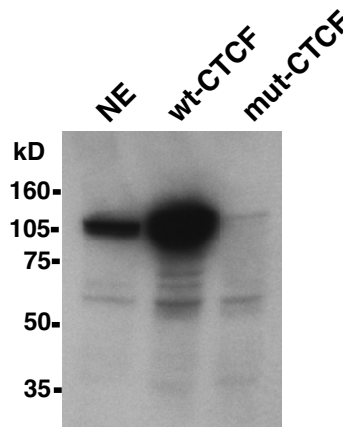

**Fig. S1.** ICAT mass spectrometry to identify proteins interacting with template-bound CTCF. (A) Flow diagram of quantitative proteomics analysis of specific CTCF complex components. (B) CTCF wild-type and mutant sequences derived from the human c-myc insulator element MINE were immobilized to magnetic beads. (C) Western analysis of CTCF protein enriched by the wildtype and mutant templates (wt-CTCF, mut-CTCF). NE, CTCF detected anti-CTCF antibodies in crude nuclear extract.

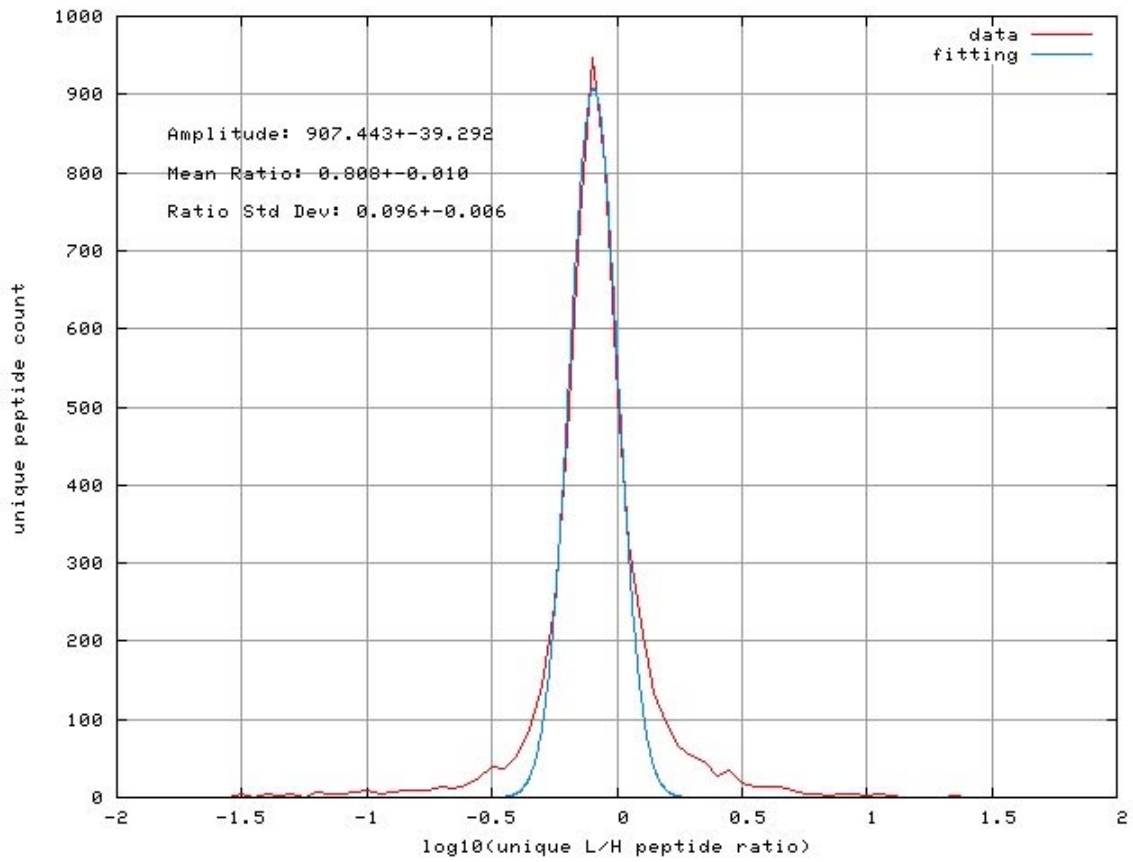

Fig. S2. Distribution of light/heavy unique peptide ratios in the quantitative MS analysis of CTCF-dependent protein interactions. The red line represents the original data, and the blue line is the fitting curve of a normal distribution over the main peak.

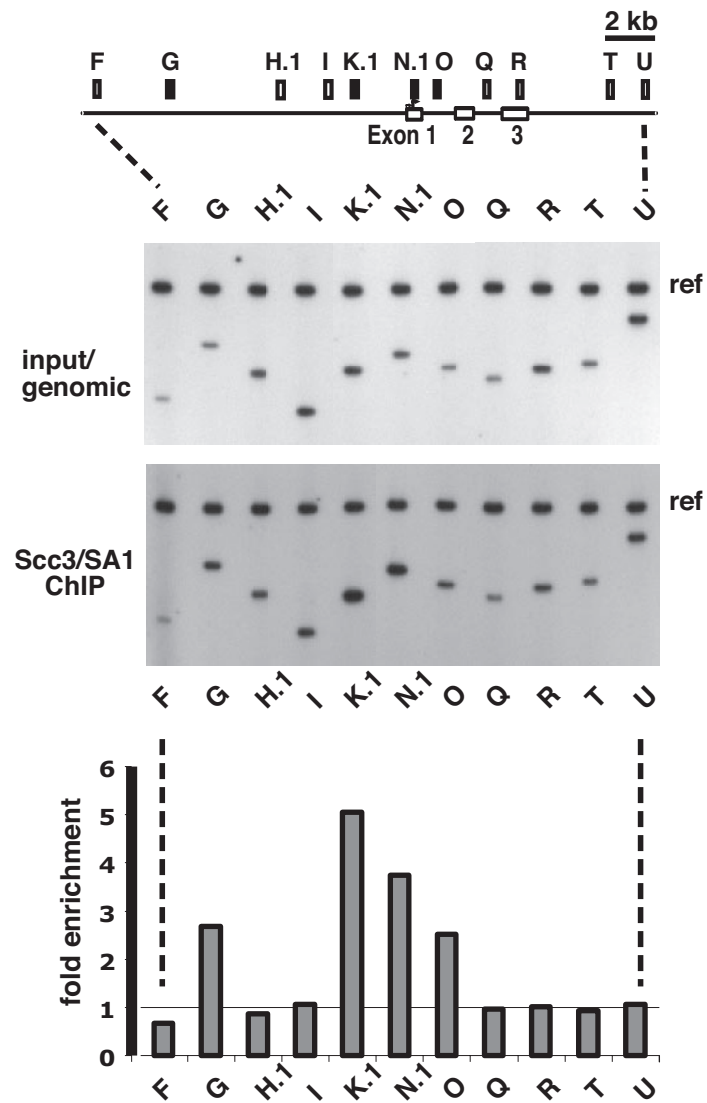

**Fig. S3.** Scc3/SA1 associates with genomic CTCF-binding regions. Chromatin immunoprecipitation experiments using anti-Scc3/SA1 antibodies reveal association of Scc3/SA1 with CTCF-binding sites. (A) Scheme of the human c-myc locus with three exons. Positions of amplicons F through U are shown by vertical bars. Filled bars indicate regions known to bind CTCF, open bars indicate regions that are not associated with CTCF. (B) Duplex PCR analysis of DNA recovered from chromatin immunoprecipitations with anti-SA1 antibodies using primers sets F through U and primers specific for the  $\beta$ -globin gene promoter as an internal reference (ref). (C) Quantification of enrichments of amplicons F through U relative to the internal reference.

PSSM #1:  $E=2.2e-136$

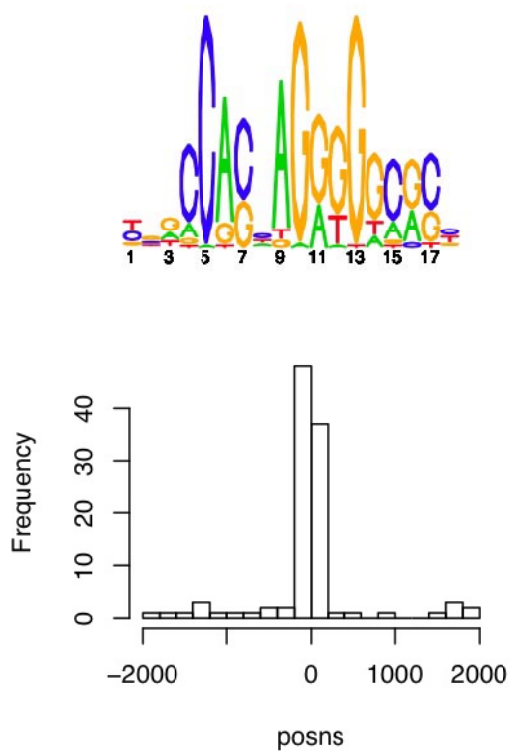

**Fig. S4.** Detection of the CTCF motif in a subset of sequences identified by ChIP-Chip. (A) Sequence logo representation of Position Specific Scoring Matrix (PSSM) identified by MEME. (B) Frequency histogram of distances of motifs from the center of ChIP-Chip hits.

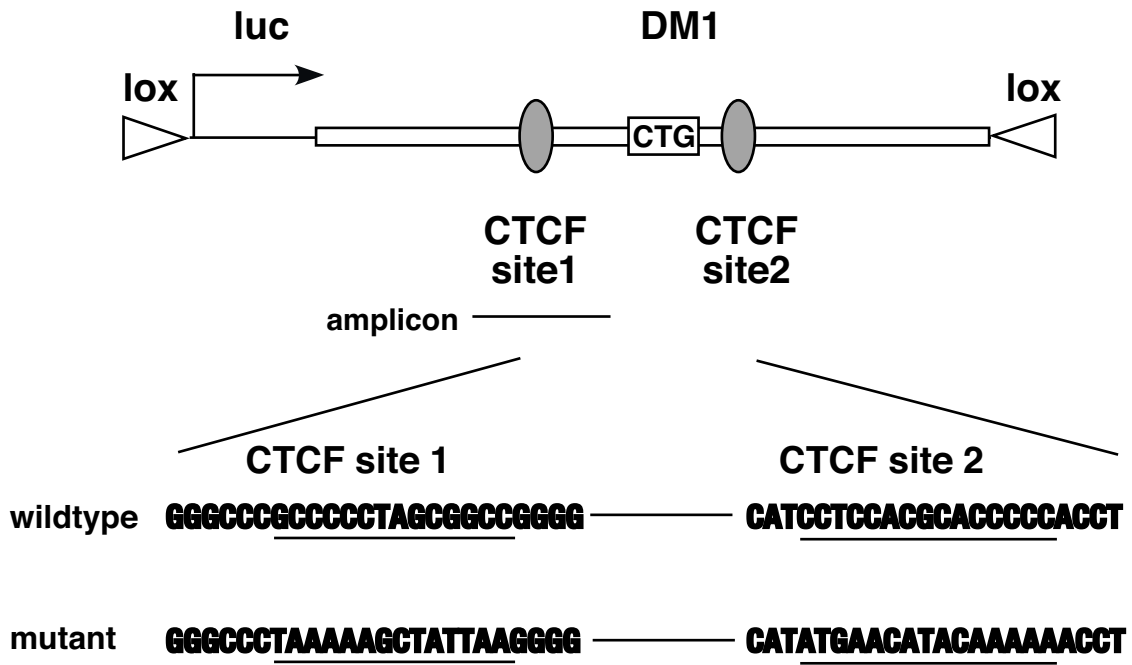

**Fig. S5.** Structure and CTCF-binding sequences of the human myotonic dystrophy locus DM1 integrated into murine 3T3 cells by Recombination Mediated Cassette Exchange [Cho DH, *et al.* (2005) Antisense transcription and heterochromatin at the DM1 CTG repeats are constrained by CTCF. *Mol Cell* 20: 483–489]. Sequence motifs for CTCF (sites 1 and 2) are separated by 203 bp. Amplification of the region indicated by a black bar (amplicon) in ChIP assays detects occupancy of both sites. Underlined sequences were mutated to abolish binding of CTCF in the mutant sequences of sites 1 and 2.

## asynchronous

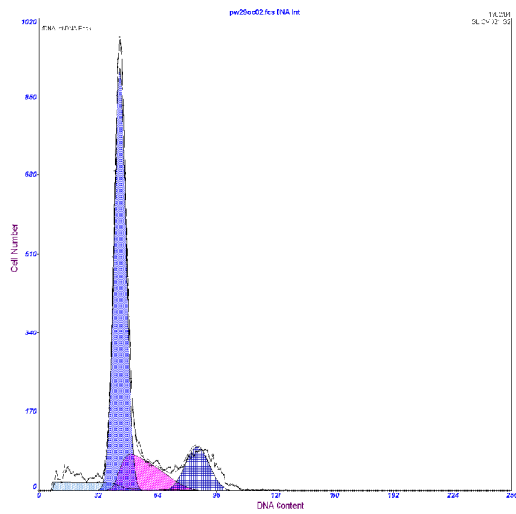

## Nocodazole treated

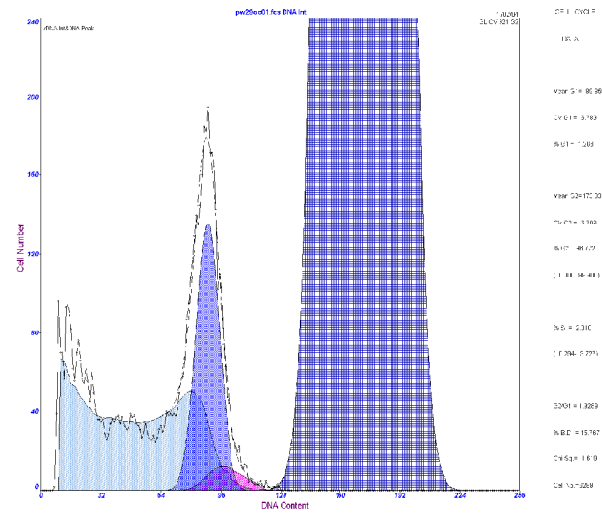

**Fig. S6.** Detection of CTCF-associated genomic regions in cycling/asynchronously growing (CTCF-Cyc) and mitotic (CTCF-Mit) HBL100 cells. Asynchronously cycling HBL100 cells were treated with 1  $\mu$ M nocodazole (Sigma) for 24 h. Cells were then harvested. To determine the distribution of cell cycle stages in untreated and nocodazole-treated cell pools, an aliquot of each preparation was fixed/labeled with DAPI fixation solution (10  $\mu$ g/ml 4,6-diamidino-2-phenylindole and 0.1% nonidet P-40 detergent in Tris-buffered saline, pH 7.4). DNA content quantitation and cell cycle analysis were performed as described [Rabinovitch *et al.* (1989) *Lab Invest* 60:65]. Briefly, the cell suspension was triturated with a 26-gauge needle and analyzed using a high-speed Influx flow cytometer and Spigot software (Cytopenia) with UV excitation and DAPI emission collected with a 450–40 UV filter. Cell cycle data were analyzed using WinCycle software (Phoenix Flow Systems). The remaining cells were subsequently prepared for chromatin immunoprecipitation. A complete list of all 70 sites that are detected within the ENCODE regions both in cycling and mitotic cells is shown in [Table S4](#).

**Table S1. Chromosomal positions, relative intensity, and *P* values of 147 CTCF peaks identified in ChIP-Chip experiments using anti-CTCF antibodies and chromatin prepared from HBL100 cells**

| Chromosome | Coordinate | Intensity   | <i>P</i> value |
|------------|------------|-------------|----------------|
| chr2       | 118288408  | 5.874429373 | 0.000          |
| chr2       | 118309792  | 2.144833241 | 0.005          |
| chr2       | 118477362  | 3.014167416 | 0.001          |
| chr2       | 220149789  | 3.657752989 | 0.001          |
| chr2       | 220200075  | 2.658218481 | 0.002          |
| chr2       | 220211709  | 1.917243609 | 0.009          |
| chr2       | 220232167  | 5.642631994 | 0.000          |
| chr2       | 220332883  | 6.183224783 | 0.000          |
| chr2       | 220427697  | 2.016111815 | 0.007          |
| chr2       | 234402223  | 2.757001183 | 0.002          |
| chr5       | 56232615   | 1.954003354 | 0.009          |
| chr5       | 131371688  | 2.631531513 | 0.003          |
| chr5       | 131428474  | 4.23783699  | 0.001          |
| chr5       | 131602012  | 3.657703234 | 0.001          |
| chr5       | 131636457  | 2.534630787 | 0.003          |
| chr5       | 131750526  | 2.630632782 | 0.003          |
| chr5       | 131783352  | 3.478291475 | 0.001          |
| chr5       | 131890350  | 2.599806809 | 0.003          |
| chr5       | 131890560  | 7.072892009 | 0.000          |
| chr5       | 132184019  | 3.713460218 | 0.001          |
| chr5       | 132229690  | 2.429856089 | 0.003          |
| chr5       | 141908686  | 2.820953727 | 0.002          |
| chr5       | 142015599  | 2.349638739 | 0.004          |
| chr5       | 142073220  | 9.632074173 | 0.000          |
| chr5       | 142077445  | 3.650085477 | 0.001          |
| chr5       | 142240463  | 1.896395591 | 0.009          |
| chr6       | 41500477   | 3.13879439  | 0.001          |
| chr6       | 41539073   | 2.290811557 | 0.004          |
| chr6       | 41667885   | 5.242354443 | 0.000          |
| chr6       | 41678845   | 2.174150879 | 0.005          |
| chr6       | 41758025   | 2.645180439 | 0.003          |
| chr6       | 41759473   | 2.568727736 | 0.003          |
| chr6       | 41811497   | 2.049282397 | 0.006          |
| chr6       | 41862983   | 4.717446684 | 0.000          |
| chr6       | 41863383   | 4.269413868 | 0.001          |
| chr6       | 73896511   | 5.847889638 | 0.000          |
| chr6       | 108541515  | 2.334676852 | 0.004          |
| chr6       | 132642648  | 2.208674974 | 0.005          |
| chr7       | 26949399   | 2.658869951 | 0.002          |
| chr7       | 26956660   | 3.372889024 | 0.001          |
| chr7       | 26956944   | 2.736828411 | 0.002          |
| chr7       | 26973971   | 4.324661858 | 0.000          |
| chr7       | 26992743   | 2.775304139 | 0.002          |
| chr7       | 27023455   | 4.233059111 | 0.001          |
| chr7       | 89485725   | 2.073798818 | 0.006          |
| chr7       | 115414478  | 3.051099487 | 0.001          |
| chr7       | 115760406  | 2.672261003 | 0.002          |
| chr7       | 116164566  | 2.992800817 | 0.001          |
| chr7       | 126487961  | 2.325384129 | 0.004          |
| chr7       | 126822987  | 2.652736571 | 0.002          |
| chr8       | 118943615  | 2.445747324 | 0.003          |
| chr9       | 128848780  | 3.07032369  | 0.001          |
| chr9       | 128945160  | 2.831807492 | 0.002          |
| chr9       | 128973802  | 6.337059749 | 0.000          |
| chr9       | 128981206  | 3.185824212 | 0.001          |
| chr9       | 128984896  | 3.523970971 | 0.001          |
| chr9       | 128985130  | 2.560341456 | 0.003          |
| chr9       | 129016020  | 3.400143552 | 0.001          |
| chr11      | 1815703    | 2.244803485 | 0.005          |
| chr11      | 1931598    | 2.655970453 | 0.002          |
| chr11      | 1980082    | 2.782060436 | 0.002          |
| chr11      | 1980352    | 1.893236344 | 0.009          |

| Chromosome | Coordinate | Intensity   | P value |
|------------|------------|-------------|---------|
| chr11      | 2129368    | 4.546737625 | 0.000   |
| chr11      | 2129803    | 2.393598581 | 0.003   |
| chr11      | 2130008    | 3.770876382 | 0.001   |
| chr11      | 2134503    | 3.246008353 | 0.001   |
| chr11      | 2164630    | 2.244276785 | 0.005   |
| chr11      | 2172792    | 3.253113348 | 0.001   |
| chr11      | 2283337    | 3.416092102 | 0.001   |
| chr11      | 5578338    | 2.176712243 | 0.005   |
| chr11      | 64013933   | 6.76979182  | 0.000   |
| chr11      | 64175154   | 3.24574888  | 0.001   |
| chr11      | 64177249   | 3.274483969 | 0.001   |
| chr11      | 64177459   | 3.118632636 | 0.001   |
| chr11      | 64212461   | 2.015285472 | 0.007   |
| chr11      | 64212701   | 5.628987147 | 0.000   |
| chr11      | 64267201   | 1.946996614 | 0.009   |
| chr11      | 64291959   | 4.8720669   | 0.000   |
| chr11      | 64311789   | 2.861076445 | 0.002   |
| chr11      | 64412233   | 4.63518868  | 0.000   |
| chr11      | 64418599   | 3.263255871 | 0.001   |
| chr11      | 116017634  | 1.900254248 | 0.009   |
| chr11      | 116067754  | 4.201662919 | 0.001   |
| chr11      | 116108806  | 3.78714867  | 0.001   |
| chr11      | 116167304  | 2.559046217 | 0.003   |
| chr11      | 131063096  | 2.108523994 | 0.006   |
| chr11      | 131069986  | 2.905633285 | 0.002   |
| chr12      | 38787753   | 3.238483196 | 0.001   |
| chr13      | 29585348   | 2.7143973   | 0.002   |
| chr13      | 29587448   | 4.034156823 | 0.001   |
| chr13      | 112520659  | 2.107411143 | 0.006   |
| chr13      | 112732062  | 2.326781522 | 0.004   |
| chr13      | 112737470  | 2.457809296 | 0.003   |
| chr14      | 52949530   | 2.031719896 | 0.007   |
| chr14      | 52968924   | 2.408243057 | 0.003   |
| chr14      | 98856276   | 1.933925394 | 0.009   |
| chr14      | 98925600   | 3.020331317 | 0.001   |
| chr14      | 98929492   | 4.198927707 | 0.001   |
| chr15      | 41594155   | 2.698635406 | 0.002   |
| chr15      | 41669861   | 5.949616141 | 0.000   |
| chr15      | 41769695   | 6.058055905 | 0.000   |
| chr15      | 41855153   | 2.039086133 | 0.007   |
| chr15      | 41857069   | 3.848107189 | 0.001   |
| chr15      | 41961599   | 2.429522684 | 0.003   |
| chr15      | 41983451   | 3.560229773 | 0.001   |
| chr16      | 55755      | 4.526460248 | 0.000   |
| chr16      | 97209      | 5.005499382 | 0.000   |
| chr16      | 107839     | 3.530421454 | 0.001   |
| chr16      | 171750     | 1.964405883 | 0.008   |
| chr16      | 352341     | 2.274586779 | 0.004   |
| chr16      | 477903     | 5.734102717 | 0.000   |
| chr18      | 59754619   | 2.554009891 | 0.003   |
| chr19      | 59037385   | 2.75618046  | 0.002   |
| chr19      | 59101907   | 2.82850388  | 0.002   |
| chr19      | 59102147   | 3.7238491   | 0.001   |
| chr20      | 33320707   | 3.534422658 | 0.001   |
| chr20      | 33355187   | 5.12228439  | 0.000   |
| chr20      | 33515119   | 2.172540464 | 0.005   |
| chr20      | 33574606   | 2.05177949  | 0.006   |
| chr21      | 33234751   | 2.507167277 | 0.003   |
| chr21      | 33421629   | 5.600152153 | 0.000   |
| chr21      | 33655591   | 4.613258444 | 0.000   |
| chr21      | 34189133   | 3.441218988 | 0.001   |
| chr21      | 34196113   | 1.912141968 | 0.009   |
| chr21      | 34218389   | 3.483195186 | 0.001   |
| chr21      | 39432271   | 2.510598306 | 0.003   |
| chr21      | 39496589   | 2.22987916  | 0.005   |



| Chromosome | Coordinate | Intensity   | <i>P</i> value |
|------------|------------|-------------|----------------|
| chr22      | 30281924   | 2.339207366 | 0.004          |
| chr22      | 30691508   | 3.839854175 | 0.001          |
| chr22      | 31099384   | 3.971228763 | 0.001          |
| chr22      | 31249716   | 4.756783674 | 0.000          |
| chr22      | 31517654   | 5.272319662 | 0.000          |
| chr22      | 31721526   | 2.976522175 | 0.001          |
| chr22      | 31739054   | 2.957423559 | 0.002          |
| chrX       | 152733957  | 3.009325505 | 0.001          |
| chrX       | 152739699  | 2.223198656 | 0.005          |
| chrX       | 152739969  | 2.171398468 | 0.005          |
| chrX       | 152800003  | 2.395622709 | 0.003          |
| chrX       | 153122674  | 4.971529195 | 0.000          |
| chrX       | 153148194  | 1.968302757 | 0.008          |
| chrX       | 153319176  | 1.8868729   | 0.009          |
| chrX       | 153327160  | 4.834800248 | 0.000          |
| chrX       | 153367231  | 2.676749206 | 0.002          |
| chrX       | 153413186  | 3.388400745 | 0.001          |
| chrX       | 153421097  | 2.724700617 | 0.002          |
| chrX       | 153540967  | 2.675242106 | 0.002          |
| chrX       | 153849586  | 3.384497013 | 0.001          |

Data generated using the NimbleGen ENCODE array. Coordinates indicate the center of the peaks and are given in NCBI build 35 (UCSC hg17).

**Table S2. Chromosomal positions (UCSC hg17), relative intensity, and *P* values of Scc3/SA1 peaks identified in ChIP-Chip experiments using anti-Scc3/SA1 antibodies and chromatin prepared from HBL100 cells**

| Chromosome | Coordinate | Intensity  | <i>P</i> value |
|------------|------------|------------|----------------|
| chr2       | 118215234  | 0.84400772 | 0.009          |
| chr2       | 118477302  | 1.62311614 | 0.000          |
| chr2       | 220544166  | 0.90840148 | 0.006          |
| chr2       | 234667504  | 1.87051592 | 0.000          |
| chr5       | 131372228  | 1.09124307 | 0.001          |
| chr5       | 131749180  | 1.78165431 | 0.000          |
| chr5       | 131783352  | 0.88631755 | 0.007          |
| chr5       | 141908716  | 1.1160577  | 0.001          |
| chr5       | 142077474  | 0.93412494 | 0.004          |
| chr6       | 41667854   | 1.13750936 | 0.001          |
| chr6       | 73896510   | 1.19846958 | 0.000          |
| chr6       | 73947626   | 1.12727368 | 0.001          |
| chr6       | 132344498  | 0.86799406 | 0.008          |
| chr7       | 26949398   | 1.95060883 | 0.000          |
| chr7       | 26956958   | 0.88325156 | 0.007          |
| chr7       | 27009302   | 1.53306407 | 0.000          |
| chr7       | 89620788   | 1.02909957 | 0.001          |
| chr7       | 115823182  | 0.87294098 | 0.007          |
| chr7       | 116164596  | 0.94317461 | 0.004          |
| chr7       | 116949900  | 1.06397079 | 0.001          |
| chr7       | 116950710  | 0.90470966 | 0.006          |
| chr9       | 128973772  | 2.38146577 | 0.000          |
| chr11      | 1977502    | 0.84711982 | 0.009          |
| chr11      | 2129832    | 1.56303939 | 0.000          |
| chr11      | 4893236    | 0.98476297 | 0.002          |
| chr11      | 5358718    | 1.09288776 | 0.001          |
| chr11      | 5529783    | 0.8628868  | 0.008          |
| chr11      | 5686106    | 1.17856233 | 0.000          |
| chr11      | 64138124   | 1.00852241 | 0.002          |
| chr11      | 64157800   | 0.93877481 | 0.004          |
| chr11      | 116255960  | 0.98181487 | 0.002          |
| chr11      | 130615552  | 0.8372373  | 0.010          |
| chr13      | 29819620   | 0.87076253 | 0.007          |
| chr13      | 112737590  | 1.0428934  | 0.001          |
| chr14      | 98780448   | 1.00568405 | 0.002          |
| chr15      | 41952138   | 0.98876922 | 0.002          |
| chr15      | 41983660   | 1.04806572 | 0.001          |
| chr19      | 59310952   | 1.63747169 | 0.000          |
| chr20      | 33515088   | 1.18426526 | 0.000          |
| chr21      | 33421598   | 1.83928176 | 0.000          |
| chr21      | 34177146   | 0.87299996 | 0.007          |

Data generated using the NimbleGen ENCODE array. Coordinates indicate the center of the peaks and are given in NCBI build 35 (UCSC hg17).

**Table S3. Colocalization of CTCF and Scc3/SA1 sites within ENCODE in HBL100 cells**

| Chromosome | CTCF coord. | CTCF intensity | CTCF <i>P</i> value | Scc3/SA1 coord. | Scc3/SA1 intensity | Scc3/SA1 <i>P</i> value | Distance |
|------------|-------------|----------------|---------------------|-----------------|--------------------|-------------------------|----------|
| chr5       | 131783352   | 3.48           | 0.001               | 131783352       | 0.89               | 0.007                   | 0        |
| chr6       | 73896511    | 5.85           | 0.000               | 73896510        | 1.20               | 0.000                   | 1        |
| chr7       | 26949399    | 2.66           | 0.002               | 26949398        | 1.95               | 0.000                   | 1        |
| chr7       | 26956944    | 2.74           | 0.002               | 26956958        | 0.88               | 0.007                   | 14       |
| chr5       | 142077445   | 3.65           | 0.001               | 142077474       | 0.93               | 0.004                   | 29       |
| chr11      | 2129803     | 2.39           | 0.003               | 2129832         | 1.56               | 0.000                   | 29       |
| chr9       | 128973802   | 6.34           | 0.000               | 128973772       | 2.38               | 0.000                   | 30       |
| chr7       | 116164566   | 2.99           | 0.001               | 116164596       | 0.94               | 0.004                   | 30       |
| chr5       | 141908686   | 2.82           | 0.002               | 141908716       | 1.12               | 0.001                   | 30       |
| chr21      | 33421629    | 5.60           | 0.000               | 33421598        | 1.84               | 0.000                   | 31       |
| chr6       | 41667885    | 5.24           | 0.000               | 41667854        | 1.14               | 0.001                   | 31       |
| chr20      | 33515119    | 2.17           | 0.005               | 33515088        | 1.18               | 0.000                   | 31       |
| chr2       | 118477362   | 3.01           | 0.001               | 118477302       | 1.62               | 0.000                   | 60       |
| chr13      | 112737470   | 2.46           | 0.003               | 112737590       | 1.04               | 0.001                   | 120      |
| chr11      | 2130008     | 3.77           | 0.001               | 2129832         | 1.56               | 0.000                   | 176      |
| chr15      | 41983451    | 3.56           | 0.001               | 41983660        | 1.05               | 0.001                   | 209      |
| chr7       | 26956660    | 3.37           | 0.001               | 26956958        | 0.88               | 0.007                   | 298      |
| chr11      | 2129368     | 4.55           | 0.000               | 2129832         | 1.56               | 0.000                   | 464      |
| chr5       | 131371688   | 2.63           | 0.003               | 131372228       | 1.09               | 0.001                   | 540      |
| chr5       | 131750526   | 2.63           | 0.003               | 131749180       | 1.78               | 0.000                   | 1346     |

"Distance" indicates the distance of the CTCF peak to the nearest Scc3/SA1 peak. Coordinates are given in NCBI build 35 (UCSC hg17). Highlighted rows indicate Scc3/SA1-associated regions for which more than one CTCF-binding site was assigned.

**Table S4. Chromosomal sites within the ENCODE regions that were associated with CTCF both in asynchronously growing and mitotic cells.**

|       | Coord. asynch | Intens.asynch | P value asynch | Coord. mitot | Intens. mitot | P value mitot |
|-------|---------------|---------------|----------------|--------------|---------------|---------------|
| chr2  | 118288408     | 5.874429373   | 0.000382673    | 118288438    | 4.47590558    | 8.15E-05      |
| chr2  | 220149789     | 3.657752989   | 0.000918414    | 220149609    | 2.77078166    | 0.000489197   |
| chr2  | 220232167     | 5.642631994   | 0.000382673    | 220232167    | 4.0083502     | 8.15E-05      |
| chr2  | 220332883     | 6.183224783   | 0.000306138    | 220332821    | 2.54599463    | 0.000896861   |
| chr2  | 220332883     | 6.183224783   | 0.000306138    | 220334783    | 2.66696729    | 0.00057073    |
| chr2  | 220427697     | 2.016111815   | 0.007041176    | 220427667    | 1.92791947    | 0.003913575   |
| chr5  | 131371688     | 2.631531513   | 0.002602174    | 131371628    | 2.90828211    | 0.000489197   |
| chr5  | 131428474     | 4.23783699    | 0.000535742    | 131428504    | 1.87607413    | 0.004402772   |
| chr5  | 131602012     | 3.657703234   | 0.000918414    | 131602102    | 3.25486342    | 8.15E-05      |
| chr5  | 131636457     | 2.534630787   | 0.002678708    | 131636544    | 2.63239161    | 0.00057073    |
| chr5  | 131783352     | 3.478291475   | 0.000994949    | 131783412    | 1.66688761    | 0.009294741   |
| chr5  | 132184019     | 3.713460218   | 0.000765345    | 132184019    | 2.2504651     | 0.001712189   |
| chr5  | 142073220     | 9.632074173   | 7.65E-05       | 142073265    | 6.35524784    | 8.15E-05      |
| chr5  | 142077445     | 3.650085477   | 0.000918414    | 142077475    | 2.51625609    | 0.001059927   |
| chr6  | 41500477      | 3.13879439    | 0.000994949    | 41500357     | 1.71290029    | 0.008316347   |
| chr6  | 41667885      | 5.242354443   | 0.000459207    | 41667885     | 5.36194567    | 8.15E-05      |
| chr6  | 41678845      | 2.174150879   | 0.004974744    | 41678845     | 1.69275591    | 0.008887077   |
| chr6  | 41678845      | 2.174150879   | 0.004974744    | 41677795     | 1.89398565    | 0.004321239   |
| chr6  | 41862983      | 4.717446684   | 0.000459207    | 41862998     | 2.75883352    | 0.000489197   |
| chr6  | 41863383      | 4.269413868   | 0.000535742    | 41863383     | 2.40430193    | 0.001467591   |
| chr6  | 73896511      | 5.847889638   | 0.000382673    | 73896511     | 2.38010565    | 0.001467591   |
| chr7  | 26973971      | 4.324661858   | 0.000459207    | 26973971     | 3.19101879    | 0.000244598   |
| chr7  | 26992743      | 2.775304139   | 0.002142966    | 26992803     | 1.83620901    | 0.005299633   |
| chr7  | 116164566     | 2.992800817   | 0.001224552    | 116164566    | 3.95061871    | 8.15E-05      |
| chr7  | 126487961     | 2.325384129   | 0.003826726    | 126486225    | 1.71262381    | 0.008316347   |
| chr9  | 128981206     | 3.185824212   | 0.000994949    | 128981266    | 2.82636636    | 0.000489197   |
| chr9  | 129016020     | 3.400143552   | 0.000994949    | 129016050    | 2.02774974    | 0.003098247   |
| chr11 | 1980082       | 2.782060436   | 0.002142966    | 1980382      | 1.69499399    | 0.008724011   |
| chr11 | 1980352       | 1.893236344   | 0.009260677    | 1980382      | 1.69499399    | 0.008724011   |
| chr11 | 2129368       | 4.546737625   | 0.000459207    | 2129353      | 3.22403423    | 8.15E-05      |
| chr11 | 2129803       | 2.393598581   | 0.003290984    | 2130008      | 2.98019512    | 0.000407664   |
| chr11 | 2130008       | 3.770876382   | 0.000765345    | 2130008      | 2.98019512    | 0.000407664   |
| chr11 | 2134503       | 3.246008353   | 0.000994949    | 2134533      | 2.72256782    | 0.000489197   |
| chr11 | 2283337       | 3.416092102   | 0.000994949    | 2283337      | 3.13502824    | 0.000326131   |
| chr11 | 64013933      | 6.76979182    | 0.000229604    | 64014023     | 1.71937824    | 0.008153282   |
| chr11 | 64175154      | 3.24574888    | 0.000994949    | 64175124     | 3.07267425    | 0.000326131   |
| chr11 | 64291959      | 4.8720669     | 0.000459207    | 64291899     | 3.18885564    | 0.000244598   |
| chr11 | 64291959      | 4.8720669     | 0.000459207    | 64292319     | 1.84384376    | 0.005136567   |
| chr11 | 64412233      | 4.63518868    | 0.000459207    | 64412233     | 4.930201      | 8.15E-05      |
| chr11 | 64418599      | 3.263255871   | 0.000994949    | 64418629     | 1.82291661    | 0.005544232   |
| chr11 | 116017634     | 1.900254248   | 0.009260677    | 116017601    | 2.13243274    | 0.002364452   |
| chr11 | 116067754     | 4.201662919   | 0.000688811    | 116068292    | 2.1360818     | 0.002364452   |
| chr11 | 116108806     | 3.78714867    | 0.000765345    | 116108866    | 3.76532064    | 8.15E-05      |
| chr11 | 116108806     | 3.78714867    | 0.000765345    | 116107786    | 2.31439422    | 0.001467591   |
| chr11 | 116167304     | 2.559046217   | 0.002678708    | 116167420    | 2.44460906    | 0.001386058   |
| chr11 | 131069986     | 2.905633285   | 0.001836828    | 131069926    | 3.55157807    | 8.15E-05      |
| chr11 | 131069986     | 2.905633285   | 0.001836828    | 131071391    | 2.20135225    | 0.00203832    |
| chr15 | 41669861      | 5.949616141   | 0.000306138    | 41669891     | 3.56016472    | 8.15E-05      |
| chr15 | 41769695      | 6.058055905   | 0.000306138    | 41769755     | 3.71486524    | 8.15E-05      |
| chr15 | 41855153      | 2.039086133   | 0.006658503    | 41855813     | 1.76001819    | 0.007501019   |
| chr15 | 41857069      | 3.848107189   | 0.000765345    | 41855813     | 1.76001819    | 0.007501019   |
| chr15 | 41983451      | 3.560229773   | 0.000918414    | 41983511     | 2.44815942    | 0.001386058   |
| chr16 | 97209         | 5.005499382   | 0.000459207    | 97149        | 3.7759144     | 8.15E-05      |
| chr16 | 107839        | 3.530421454   | 0.000918414    | 107839       | 2.41265174    | 0.001467591   |
| chr16 | 477903        | 5.734102717   | 0.000382673    | 477903       | 1.64593652    | 0.009783938   |
| chr18 | 59754619      | 2.554009891   | 0.002678708    | 59754679     | 2.39521204    | 0.001467591   |
| chr18 | 59754619      | 2.554009891   | 0.002678708    | 59755364     | 2.32337051    | 0.001467591   |
| chr19 | 59101907      | 2.82850388    | 0.002142966    | 59102147     | 4.23568068    | 8.15E-05      |
| chr19 | 59102147      | 3.7238491     | 0.000765345    | 59102147     | 4.23568068    | 8.15E-05      |
| chr20 | 33320707      | 3.534422658   | 0.000918414    | 33320707     | 2.54822968    | 0.000896861   |
| chr20 | 33355187      | 5.12228439    | 0.000459207    | 33355142     | 4.16667121    | 8.15E-05      |
| chr20 | 33574606      | 2.05177949    | 0.006352365    | 33574666     | 2.49817771    | 0.001141459   |
| chr21 | 33421629      | 5.600152153   | 0.000382673    | 33421749     | 2.29553862    | 0.001549124   |

|       | Coord. asynch | Intens.asynch | <i>P</i> value asynch | Coord. mitot | Intens. mitot | <i>P</i> value mitot |
|-------|---------------|---------------|-----------------------|--------------|---------------|----------------------|
| chr21 | 33655591      | 4.613258444   | 0.000459207           | 33655531     | 2.41998693    | 0.001467591          |
| chr21 | 34218389      | 3.483195186   | 0.000994949           | 34218479     | 3.79165518    | 8.15E-05             |
| chr22 | 30691508      | 3.839854175   | 0.000765345           | 30691508     | 1.99544755    | 0.003261313          |
| chr22 | 31099384      | 3.971228763   | 0.000765345           | 31099354     | 2.95974811    | 0.000407664          |
| chr22 | 31517654      | 5.272319662   | 0.000459207           | 31517624     | 3.90993461    | 8.15E-05             |
| chrX  | 153122674     | 4.971529195   | 0.000459207           | 153122659    | 2.33527061    | 0.001467591          |
| chrX  | 153122674     | 4.971529195   | 0.000459207           | 153123079    | 3.13040943    | 0.000326131          |
| chrX  | 153148194     | 1.968302757   | 0.008418797           | 153148024    | 2.11652508    | 0.002527517          |
| chrX  | 153367231     | 2.676749206   | 0.00237257            | 153367381    | 1.67180581    | 0.009050143          |
| chrX  | 153413186     | 3.388400745   | 0.000994949           | 153413137    | 3.05350893    | 0.000326131          |
| chrX  | 153849586     | 3.384497013   | 0.000994949           | 153849616    | 2.18847706    | 0.00203832           |

Coordinates represent the chromosomal coordinates (NCBI build 35; hg17) of the center of the peaks detected in asynchronously growing (coordin. asynch) and mitotic cells (coordin.mitot.). The relative intensities and *P* values of individual peaks are also indicated.
